# Supplementary material for: Design, synthesis and biological evaluation of a hybrid compound of berberine and magnolol for improvement of glucose and lipid metabolism
Source: Royal Society of Chemistry journal article supplement (doi:10.1039/c6ra15100k), 2016-01-01
Supplement: c6ra15100k1.pdf [file c6ra15100k1.pdf]

## *Electronic Supplementary Information (ESI)*

### **Design, synthesis and biological evaluation of a hybrid compound berberine and magnolol for improvement of glucose and lipid metabolism**

Yan Li,<sup>a</sup> Xiao Yuan,<sup>b</sup> Xianglu Rong,<sup>c</sup> Ying Gao,<sup>a</sup> Zhibin Qiu,<sup>a</sup> Zhipeng Zhang,<sup>c</sup> Dongbin Zhou,<sup>b</sup>  
and Weimin Li<sup>a\*</sup>

School of Chinese Material Medical, Guangzhou University of Chinese Medicine,  
Guangzhou 510006, People's Republic of China. 13925023915@139.com

### **Table of Contents**

|                                                                                                                    |    |
|--------------------------------------------------------------------------------------------------------------------|----|
| 1. <sup>1</sup> H NMR, <sup>13</sup> C NMR and HRMS spectra for Berberrubine 1 .....                               | S2 |
| 2. <sup>1</sup> H NMR, <sup>13</sup> C NMR and HRMS spectra for 9-(2-ethyl bromide) berberine hydrochloride 2..... | S3 |
| 3. <sup>1</sup> H NMR and <sup>13</sup> C NMR spectra for berberine and magnolol hybrid compound (HHS) 3 .....     | S4 |
| 4. HPLC profile for HHS .....                                                                                      | S6 |
| 5. The oligonucleotide primer sequence used for real-time PCR.....                                                 | S7 |

# 1. <sup>1</sup>H NMR, <sup>13</sup>C NMR and HRMS spectra for Berberrubine 1

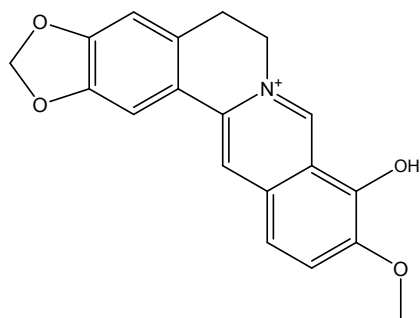

## <sup>1</sup>H NMR (300MHz, CDCl<sub>3</sub>)

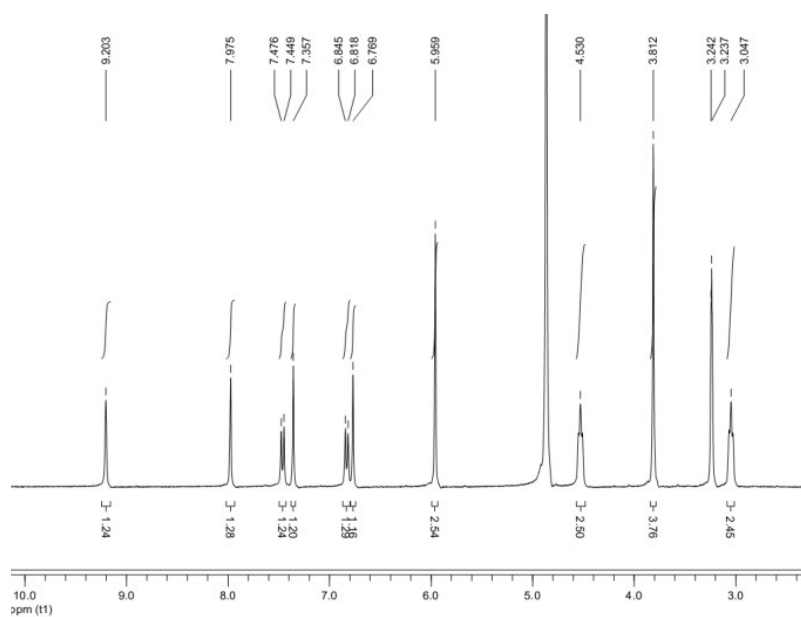

## <sup>13</sup>C NMR (300MHz, CDCl<sub>3</sub>)

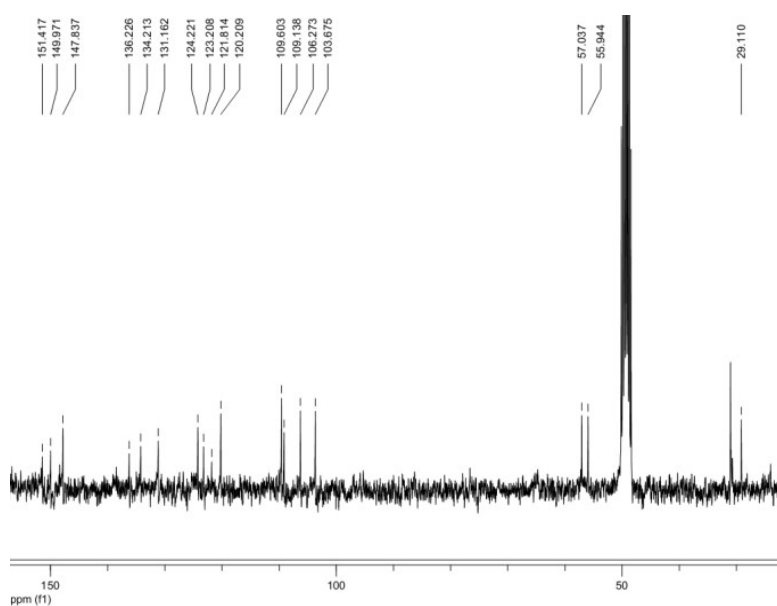

## HRMS

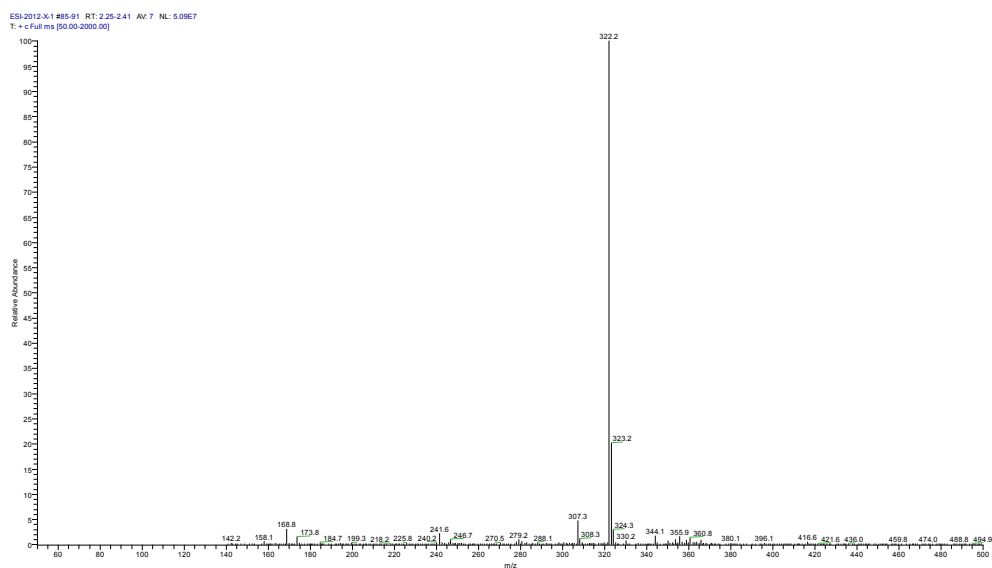

## 2. $^1\text{H}$ NMR, $^{13}\text{C}$ NMR and HRMS spectra for 9-(2-ethyl bromide) berberine hydrochloride 2

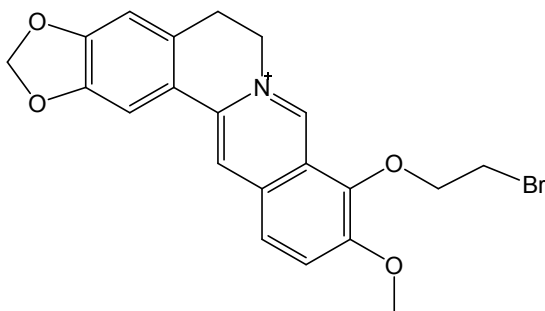

### $^1\text{H}$ NMR (300MHz, $\text{CDCl}_3$ )

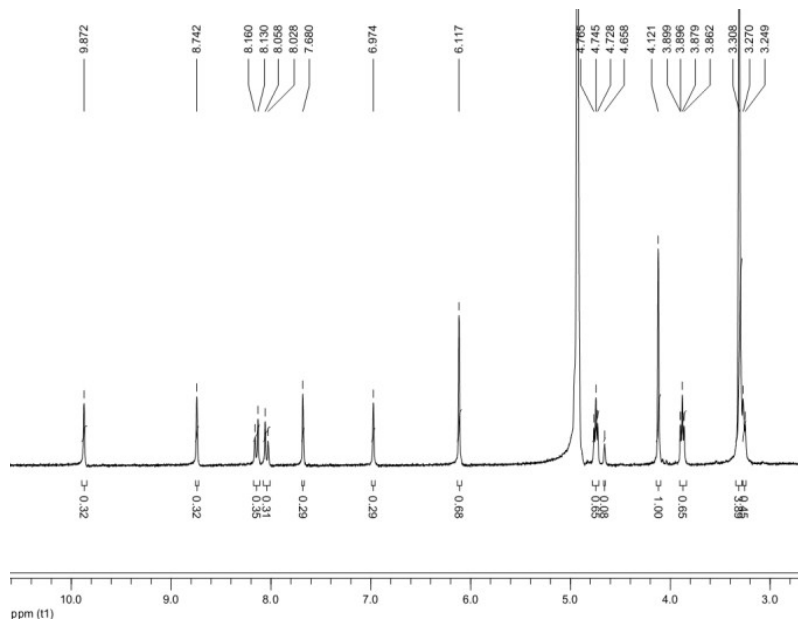

### <sup>13</sup>C NMR (300MHz, CDCl<sub>3</sub>)

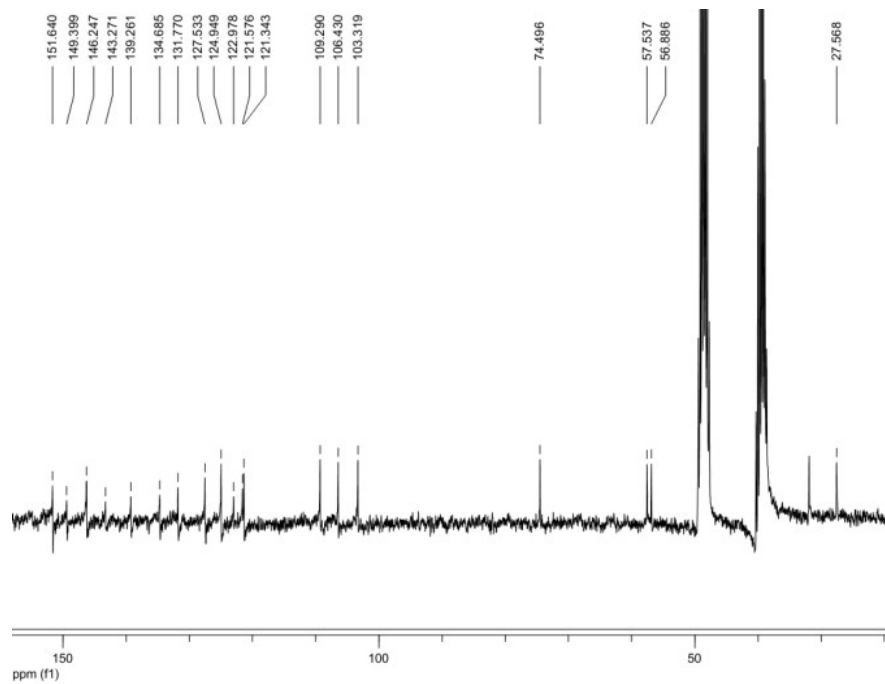

### HRMS

ESI 2012-X2 #99-101 RT: 2.62-2.67 AV: 3 NL: 6.17E7  
T: +c Full ms [50.00-2000.00]

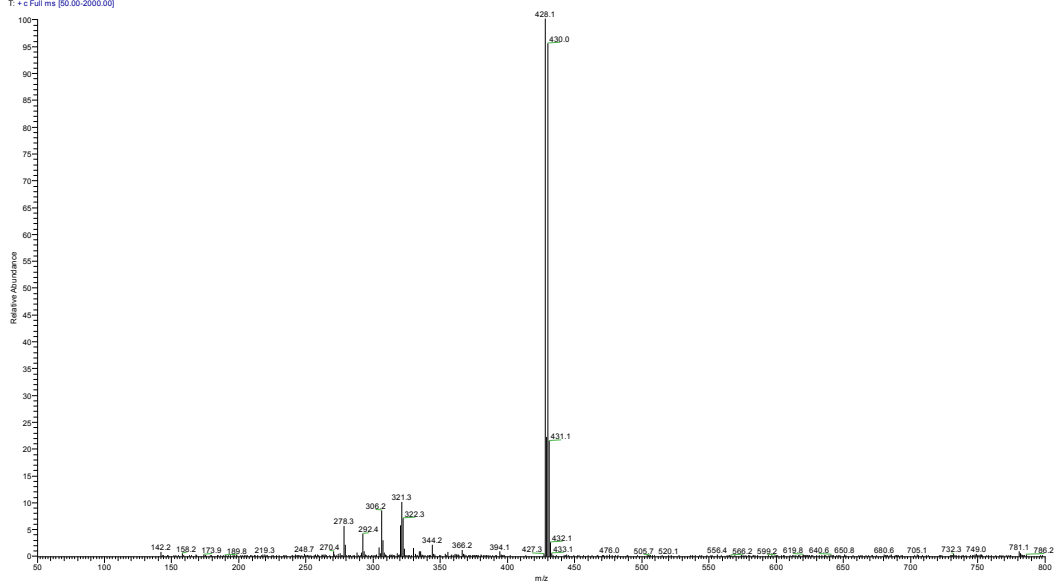

### 3. <sup>1</sup>H NMR and <sup>13</sup>C NMR spectra for berberine and magnolol hybrid compound (HHS) 3

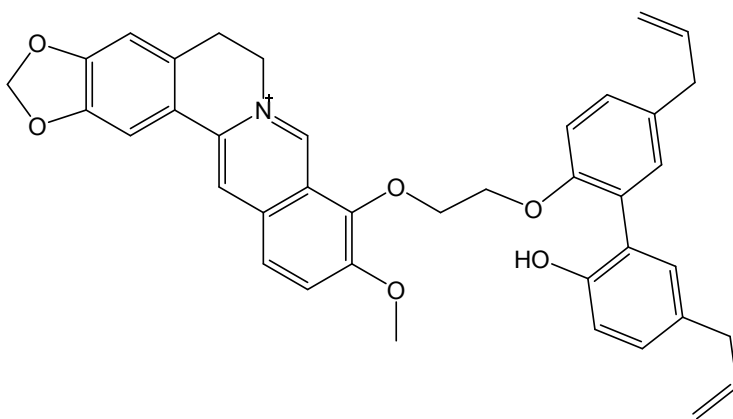

<sup>1</sup>H NMR (500MHz, CDCl<sub>3</sub>)

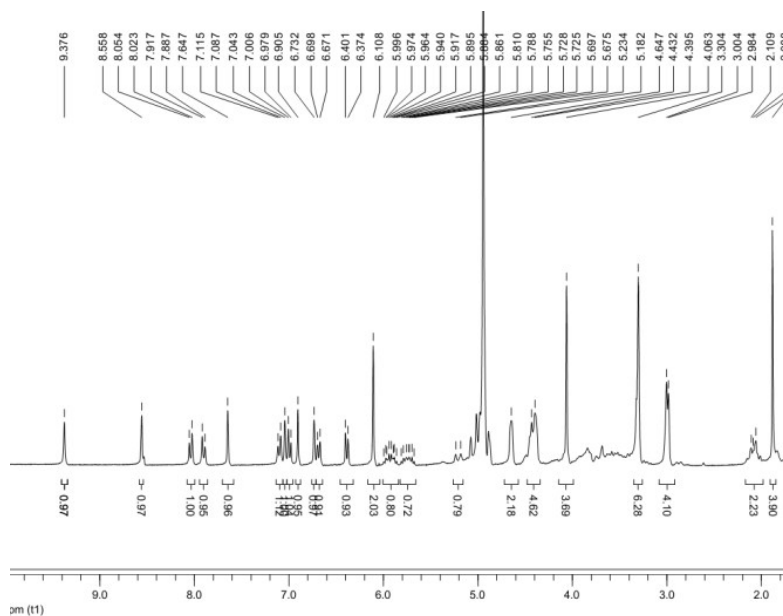

<sup>13</sup>C NMR (300MHz, CDCl<sub>3</sub>)

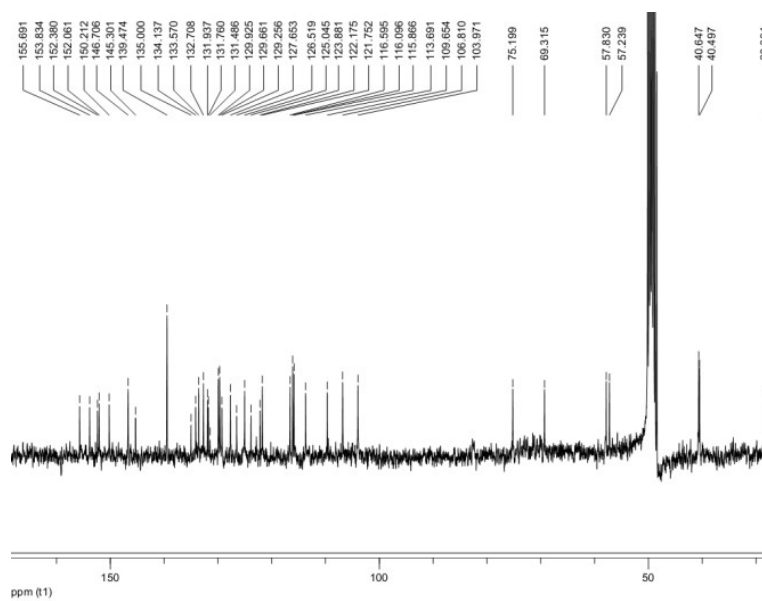

# HRMS

ESI 2012-X3 #59.44 RT: 1.45-1.57 AV: 6 NL: 1.67E8  
T: + Full ms (50.00-2000.00)

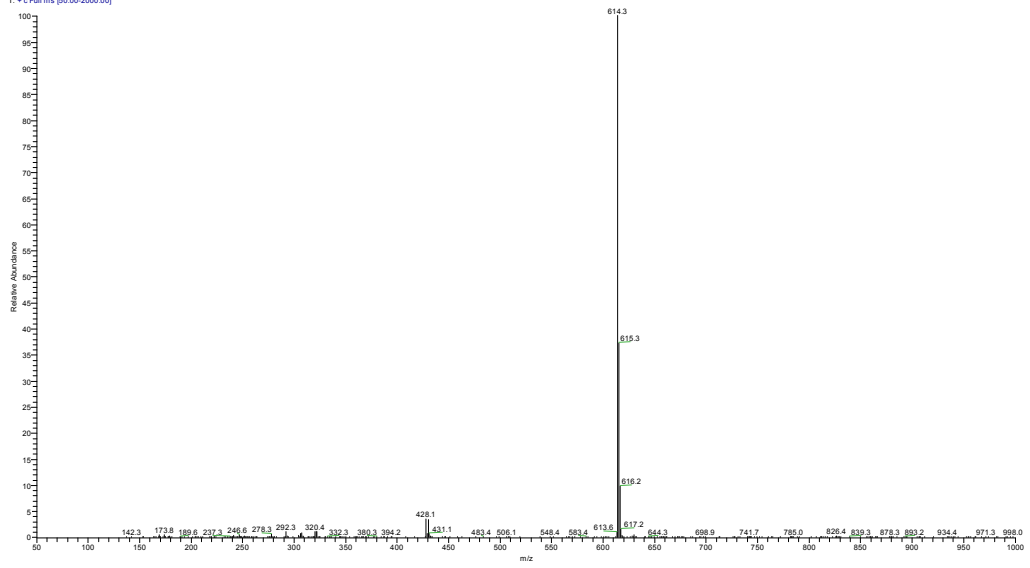

## 4. HPLC profile for HHS

### Dual wavelength HPLC (the spectra of before and after)

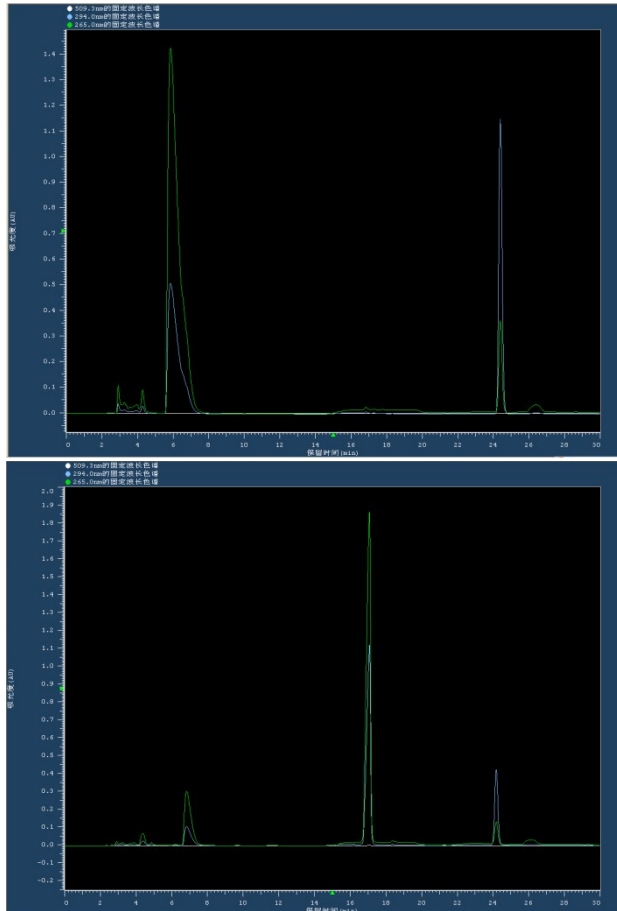

### Three Dimensional HPLC (the spectra of before and after )

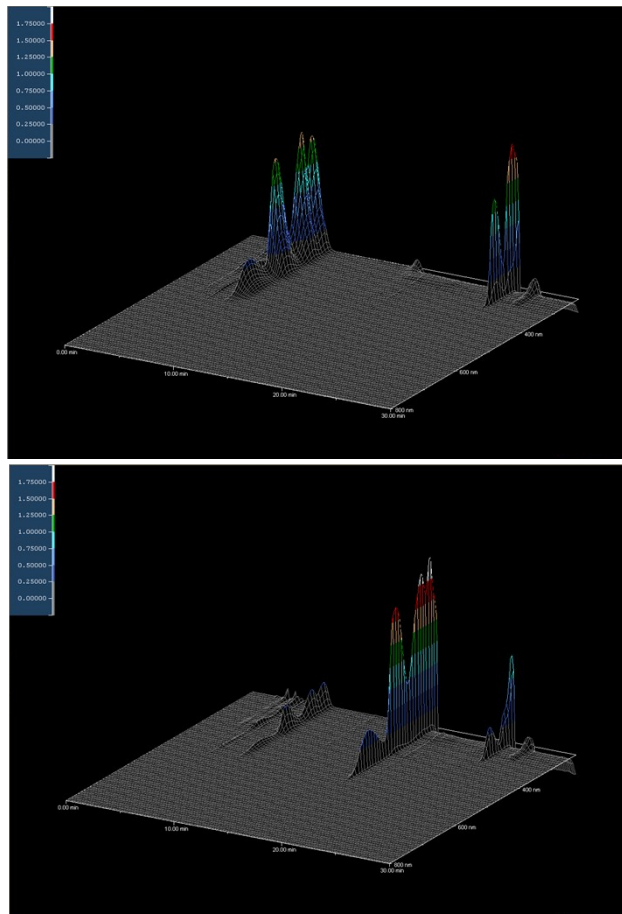

### 5. The oligonucleotide primer sequence used for real-time PCR

Table 1 The oligonucleotide primer sequence used for real-time PCR.

| Gene name       | Accession No. | Forward primer                | Reverse primer               |
|-----------------|---------------|-------------------------------|------------------------------|
| $\beta$ -actin  | NM_031144     | GGAGATTACTGCCCTGGCTCCTA       | GACTCATCGTACTCCTGCTTGCT<br>G |
| PPAR $\gamma$ 2 | NM_011146.3   | GGAGCCTAAGTTTGAGTTTGCTGT<br>G | TGCAGCAGGTTGTCTTGGATG        |
| C/EBP $\alpha$  | NM_007678.3   | TTGAAGCACAAATCGATCCATCC       | GCACACTGCCATTGCACAAG         |
| UCP2            | NM_011671.5   | CTTCAGCACACAAGGGCACA          | AGGCCAACTGACAGCATTCCCTA      |
| FAS             | NM_007988     | TGCTGTTGGAAGTCAGCTATGAA       | GATGCCTCTGAACCACTCACAC       |
| Adiponectin     | NM_009605.4   | TTCTGTCTGTACGATTGTCAGTGG      | GTCATCTTCGGCATGACTGG         |
